# Supplementary material for: An umbrella review of the evidence linking oral health and systemic noncommunicable diseases
Source: PubMed Central journal article supplement (PMC9734115; doi:10.1038/s41467-022-35337-8), 2022-12-09
Supplement: 41467_2022_35337_MOESM2_ESM.pdf [file 41467_2022_35337_MOESM2_ESM.pdf]

## **Description of Additional Supplementary Files**

File Name: Supplementary Data 1

Description: List of excluded studies with justification for exclusion.

File Name: Supplementary Data 2

Description: Detailed information on the characteristics of the included systematic reviews.

File Name: Supplementary Data 3

Description: Summary of the country origin of the systematic review.

File Name: Supplementary Data 4

Description: AMSTAR 2 results.

File Name: Supplementary Data 5

Description: Detailed information on meta-analytical data and analysis of the included systematic reviews.

File Name: Supplementary Data 6

Description: PRISMA checklist.
